# Supplementary material
Source: Springer Nature journal article supplement (https://www.springermedizin.de/resource/supplementary/13075_2012_4013_MOESM13_ESM.pdf/9695840)

Control

IL-1 $\beta$

TNF $\alpha$

0 h

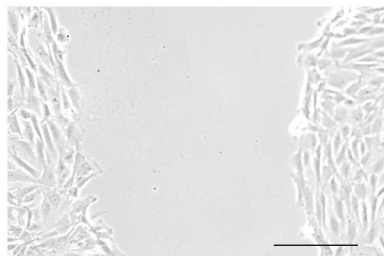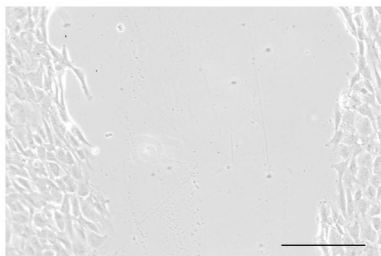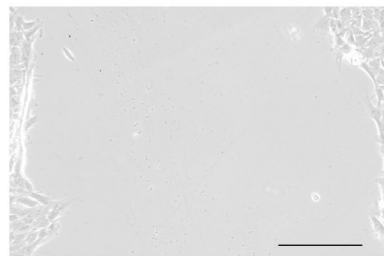

24 h

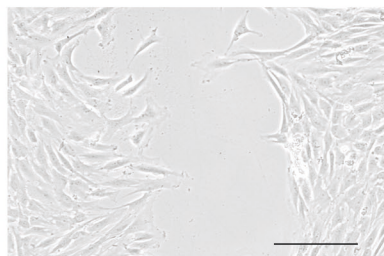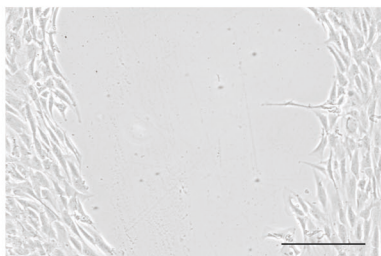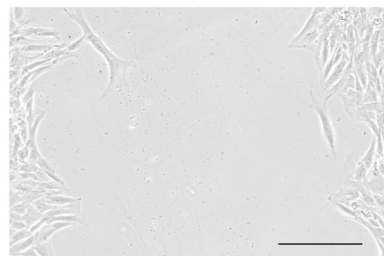

48 h

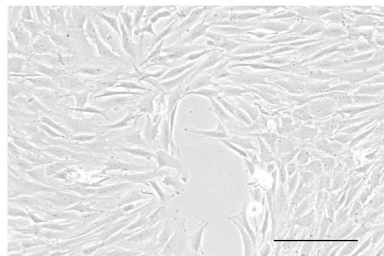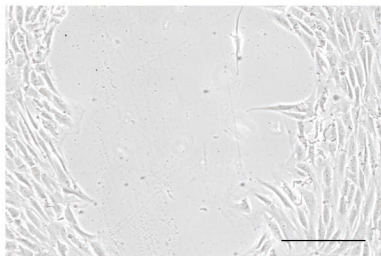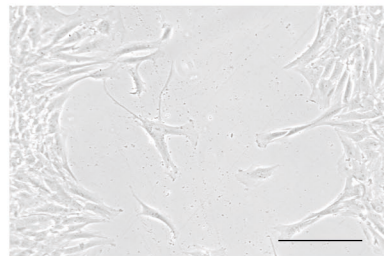

Supplement: MOESM13 [file 9695840]
